# Supplementary material for: ntrC Contributes to Nitrogen Utilization, Stress Tolerance, and Virulence in Acidovorax citrulli
Source: MDPI journal article supplement (doi:10.3390/microorganisms11030767), 2023-03-16
Supplement: s1 [file s1]

## Supplementary Materials

**Supplementary Materials:** The following supporting information can be downloaded at: [www.mdpi.com/xxx/s1](http://www.mdpi.com/xxx/s1), Table S1: Strains and plasmids used in this study; Table S2: Primers for amplification of target fragments.

**Table S1.** Strains and plasmids used in this study

| Strain or plasmid                    | Description                                                                                                                    | Reference or source |
|--------------------------------------|--------------------------------------------------------------------------------------------------------------------------------|---------------------|
| <b>Strain</b>                        |                                                                                                                                |                     |
| <i>Escherichia coli</i> DH5 $\alpha$ | $\Phi$ 80 <i>lacZ</i> $\Delta$ M15 $\Delta$ ( <i>lacZYA</i> -argF) U169 <i>endA1recA1 hsdR17supE44 thi-1 gyrA96 relA1 phoA</i> | Tiagen, China       |
| Aac5-WT                              | <i>Acidovorax citrulli</i> , wild-type, Amp <sup>R</sup>                                                                       | Lab collection      |
| Aac5                                 | Aac5-WT containing the empty vector pBBR1MCS-2, Amp <sup>R</sup> , Km <sup>R</sup>                                             | This study          |
| Aac5 $\Delta$ <i>ntrC</i>            | <i>ntrC</i> gene deletion mutant derived from Aac5, containing empty vector pBBR1MCS-2, Amp <sup>R</sup> , Km <sup>R</sup>     | This study          |
| Aac5 $\Delta$ <i>ntrC</i> comp       | $\Delta$ <i>ntrC</i> complemented with <i>ntrC</i> gene, Amp <sup>R</sup> , Km <sup>R</sup>                                    | This study          |
| <b>Plasmid</b>                       |                                                                                                                                |                     |
| pK18 <i>mobsacB</i>                  | Suicide vector for mutagenesis, Km <sup>R</sup>                                                                                | Lab collection      |
| pK18- <i>ntrC</i>                    | Suicide vector carrying DNA fragment for generating mutant $\Delta$ <i>ntrC</i> , Km <sup>R</sup>                              | This study          |
| pBBR1MCS-2                           | Broad host expression vector, Km <sup>R</sup>                                                                                  | Lab collection      |
| pBBR1MCS- <i>ntrC</i>                | Broad host expression vector carrying <i>ntrC</i> gene for $\Delta$ <i>ntrC</i> comp, Km <sup>R</sup>                          | This study          |

Km<sup>R</sup> and Amp<sup>R</sup> indicate resistance to kanamycin and ampicillin, respectively.

**Table S2.** Primers for amplification of target fragments

| Primers                      | Primer sequence (5'-3')                   | Target length/bp |
|------------------------------|-------------------------------------------|------------------|
| <i>ntrC</i> -1F              | CTATGACATGATTACGAATTCGCCGAATACACCCAGGTCAT | 592              |
| <i>ntrC</i> -1R              | AGCGGAACGGATGAGCAATCGAAGTGAATGTCTCCGGAC   |                  |
| <i>ntrC</i> -2F              | GTCCGGAGACATTCACTTCGATTGCTCATCCGTTCCGCT   |                  |
| <i>ntrC</i> -2R              | ACGACGGCCAGTGCCAAGCTTTGCCTCGTCCCACTCCAT   | 532              |
| $\Delta$ <i>ntrC</i> comp-1F | GGCGGCCGCTCTAGAACTAGTGGCGATTGGGGGATACTTC  |                  |
| $\Delta$ <i>ntrC</i> comp-1R | AGGGAATGAGGATGCGGAAGCCGTCCTGATGCAGCA      |                  |
| $\Delta$ <i>ntrC</i> comp-2F | TGCTGCATCAGGACGGCTTCCGCATCCTCATTCCCT      | 1763             |
| $\Delta$ <i>ntrC</i> comp-2R | GGTACCGGGCCCCCTCGAGCGAAAACAGGAGCAAACCG    |                  |
| $\Delta$ <i>ntrC</i> -F      | CGGAGACATTCACTTCGAGAC                     |                  |
| $\Delta$ <i>ntrC</i> -R      | CGCTCCTCCGTGACCTCT                        | 447              |
| WFB1                         | GACCAGCCACACTGGGAC                        | 360              |
| WFB2                         | CTGCCGCACTCCAGCGA                         |                  |
| Kan-F                        | CAAGATGGATTGCACGCA                        | 738              |
| Kan-R                        | CTTGAGCCTGGCGAACA                         |                  |
| <i>ntrC</i> -qF              | GGCCTGCCGGTCATCATC                        | 158              |
| <i>ntrC</i> -qR              | ACCTCTTCCCGCTGGCTTT                       |                  |
| <i>nasS</i> -F               | TGAACGGCGAACTGGACTT                       | 116              |
| <i>nasS</i> -R               | GCCGTTGTTGTTGAGGGTC                       |                  |
| <i>nasT</i> -F               | TTCAACCTGGTGGCGACG                        | 173              |

|                |                       |     |
|----------------|-----------------------|-----|
| <i>nasT</i> -R | TCGTCGTTGGTGAACAGCA   |     |
| <i>flhD</i> -F | TTCGTTGCCGACCTTCTTG   | 171 |
| <i>flhD</i> -R | TTCCGCCTGGGCATCAA     |     |
| <i>flhC</i> -F | TGGAAGTGTCTACCAAGGC   | 126 |
| <i>flhC</i> -R | GCGTGAGCATACCGGCAT    |     |
| <i>fliA</i> -F | ACACCGCCAAAGGACAGCT   | 178 |
| <i>fliA</i> -R | CCCTGCGTCACCTCGTAGC   |     |
| <i>fliC</i> -F | GCTCGTTGACGATTTCAT    | 179 |
| <i>fliC</i> -R | TTCCTTTCCCAGGAAGAAGT  |     |
| <i>fliM</i> -F | ATCGTCTGCGAGCCGTCCT   | 179 |
| <i>fliM</i> -R | AGCGGGTAGATGCCGTGCC   |     |
| <i>hrpG</i> -F | CTCGCCTGGCTGCTGTT     | 197 |
| <i>hrpG</i> -R | GCTTGTAAGATGTGCTGCTCC |     |
| <i>hrpE</i> -F | GTCAGGATGGACACGCAGGC  | 119 |
| <i>hrpE</i> -R | AACGCATGGTGCTGGCAGAG  |     |
| <i>hrpX</i> -F | GCGCTCACGCAAATGCT     | 175 |
| <i>hrpX</i> -R | GGCAAGCTCCTCCTGTCCTA  |     |
| <i>hrcJ</i> -F | CGGCAAGACCTGGAACG     | 174 |
| <i>hrcJ</i> -R | GCGACGCCATAGATGAAGC   |     |
| <i>pilA</i> -F | TCAAGACGACTGCCGATGG   | 150 |
| <i>pilA</i> -R | AAGAGCCAACCTTGCTGCCC  |     |
| <i>pilN</i> -F | CTGGAGGGGCAGATCAAGG   | 175 |
| <i>pilN</i> -R | CCGCCTGCTTCAGACTCG    |     |

---
